# Supplementary material for: Knowledge of cervical cancer and Pap smear among Uyghur women from Xinjiang, China
Source: PubMed Central journal article supplement (PMC5773149; doi:10.1186/s12905-018-0512-5), 2018-01-17
Supplement: 12905_2018_512_MOESM1_ESM.pdf [file 12905_2018_512_MOESM1_ESM.pdf]

1.4.2 爱人的结婚次数:           |\_|\_|次

1.4.3 同房次数:

- ①≤1次/周   ②2次/周   ③3次/周  
④≥4次/周   ⑤1次/2周   ⑥1次/3周  
⑦≥1次/4周

1.4.4 是否愿意避孕:

- ①是           ②否

1.4.5 避孕方法: (可多选)

- ①宫内节育器   ②体外避孕   ③口服避孕药  
④避孕套       ⑤输卵管结扎  
⑥未避孕       ⑦绝经       ⑧其他(说明\_\_)

1.4.6 对避孕套的态度:

- ①可以       ②一般       ③烦感  
④喜欢       ⑤未使用过

1.5.1 月经期用材: (可多选)

- ①卫生纸       ②其他纸       ③布  
④卫生巾

1.5.2 厕所用材: (可多选)

- ①卫生纸       ②其他纸       ③布  
④土块

1.5.3 同房前洗外阴:

- ①是           ②否

1.5.4 洗外阴前洗手:

- ①直接洗       ②用肥皂

1.5.5 同房前洗阴道:

- ①是           ②否

1.5.6 同房后洗外阴:

- ①是           ②否

1.5.7 同房后洗阴道:

- ①是           ②否

1.5.8 做礼拜前洗阴道:

- ①是           ②否

1.6.1 同房后洗澡:

- ①是           ②否

1.6.2 洗澡频率:

- ① 1-3天/次   ②3-5天/次   ③7天/次  
④14天/次   ⑤1月/次   ⑥ 3月/次  
⑦1年/2次

1.6.3 更换内裤频率:

- ①1-3天/次   ②3-5天/次   ③7天/次  
④14天/次   ⑤1月/次

1.6.4 每次礼拜前是否更换垫布

- ①是           ②否

## 2. 选择医院

2.1 当出现身体不适首先选择:

①维医      ②中医      ③西医

2.2 当被查出疾病时首先选择:

①维医保守治疗

②中医保守治疗

③西医手术治疗

### **3. 对宫颈癌与 HPV 认知程度**

#### **3.1 对定期检查和巴氏涂片认知程度**

3.1.1 做定期检查的意义:

①知道      ②不知道

3.1.2 定期行涂片的意义:

①知道      ②不知道

3.1.3 曾经是否做过妇科检查:

①是              ②否(跳至问题 3.1.5)

3.1.4 曾经做过妇科检查的原因:

①因为有症状 ②常规体检

③认为妇检可以解决所有的妇科问题

④医生建议    ⑤有免费体检项目

3.1.5 曾经是否做过宫颈涂片:

①是              ②否(跳至问题 3.2)

3.1.6 曾经做过宫颈涂片的原因:

①常规体检    ②因为有症状 ③医生建议

#### **3.2 妇女对宫颈癌及其相关知识的认知程度**

3.2.1 是否知道宫颈癌:

①是              ②否 (跳至问题 3.2.8)

3.2.2 引起宫颈癌的高危因素: (可多选)

①多个性伴侣 ②性生活过早

③宫内节育器 ④口服避孕药 ⑤HPV

⑥宫颈癌家族史              ⑦多胎

⑧命中注定    ⑨跟丈夫有关 ⑩不知道

3.2.3 宫颈癌的症状: (可多选)

①同房后出血 ②绝经后阴道流血

③阴道排出腥臭味分泌物

④月经紊乱    ⑤疼痛              ⑥不知道

3.2.4 知道宫颈癌的好发年龄:

①是              ②否

3.2.5 宫颈癌筛查的方法有哪些: (可多选)

①液基细胞学 ②宫颈活检    ③超声检查

④妇检(双合诊检查)              ⑤HPV 检 ⑥不知道

3.2.6 宫颈癌筛查的时间间隔多长为合适:

①至少每年一次

②至少两年一次

③至少每三年一次

④至少终身一次                      ⑤不知道

**3.2.7 对宫颈癌的预防了解情况:**

- ①可以预防                      ②可以在癌前期发现  
③可以早期发现                ④癌症无法防治  
⑤不知道

**3.2.8 不参加定期普查及宫颈涂片的原因: (可多选)**

- ①不知道其意义   ②没有任何症状  
③没有时间        ④没有钱  
⑤交通不方便     ⑥非常尴尬  
⑦爱人不同意     ⑧宗教原因  
⑨害怕疼痛

**3.3 妇女对 HPV 的认知程度**

**3.3.1 知道什么是 HPV:**

- ①是                      ②否

**3.3.2 任何关于 HPV 的信息:**

- ①知道                ②不知道 (跳至问题 4.1)

**3.3.3 HPV 是宫颈癌的重要病因:**

- ①知道                ②不知道

**3.3.4 HPV 可以引起男女生殖器疣:**

- ①知道                ②不知道

**3.3.5 HPV 可以通过性传播:**

- ①知道                ②不知道

**3.3.6 HPV 和宫颈癌相关知识的来源:**

- ①电视                ②收音机  
③印刷产品        ④亲戚和朋友  
⑤清真寺            ⑥网络  
⑦广告                ⑧集体讲座  
⑨曾参加过普查项目  
⑩医院和医护人员

**4. 配偶个人史**

**4.1 丈夫是否吸烟:**

- ①是                      ②否 (跳至问题 5.6)

**4.2 丈夫吸烟频率:**        |\_\_|\_\_|支/天(香烟)  
                                         |\_\_|\_\_|克/天(莫合烟)

**4.3 丈夫吸烟地点:**

- ①屋内                ②院内                ③院外

**4.4 丈夫开始吸烟年龄:** |\_\_|\_\_|岁

**4.5 丈夫是否已戒烟:**

- ①是                      ②否

**4.6 丈夫是否吸毒:**

- ①是                      ②否 (跳至问题5.8)

**4.7 丈夫如吸毒为下列哪种: (可多选)**

- ①大麻                ②海洛因            ③吗啡

调查员签字: \_\_\_\_\_

日期: |\_|\_|\_|\_|年|\_|\_|月|\_|\_|日
